# Supplementary material for: Fc receptor-like 2 (FCRL2) is a novel marker of low-risk CLL and refines prognostication based on IGHV mutation status
Source: PubMed Central journal article supplement (PMC6520396; doi:10.1038/s41408-019-0207-7), 2019-05-15

**Figure S1**

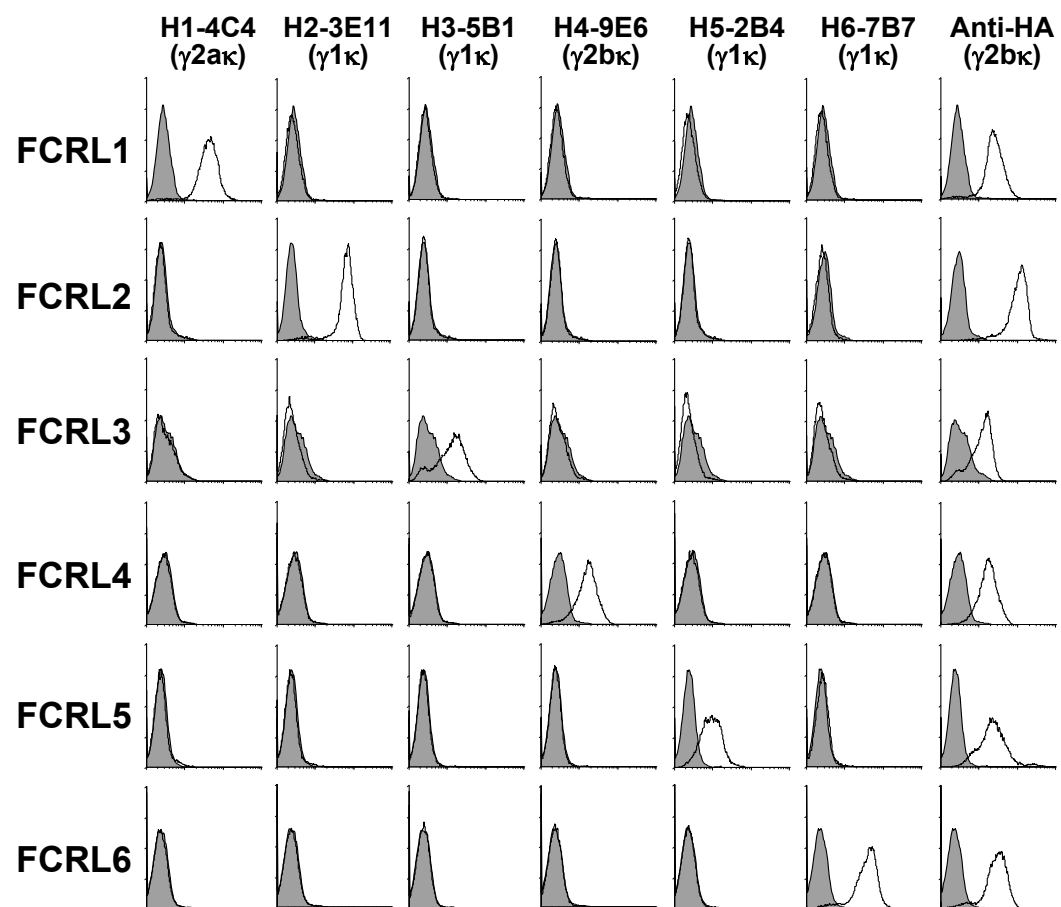

Figure S2

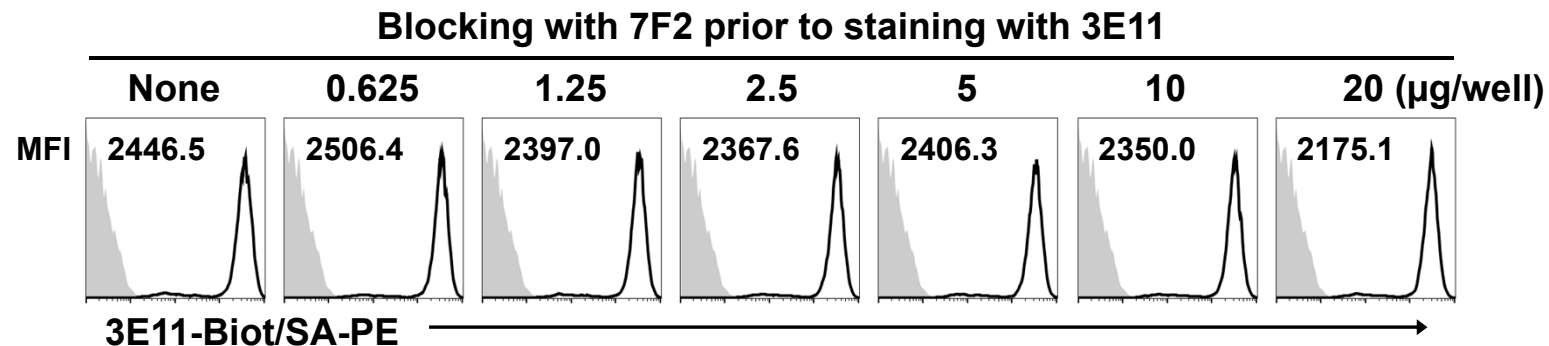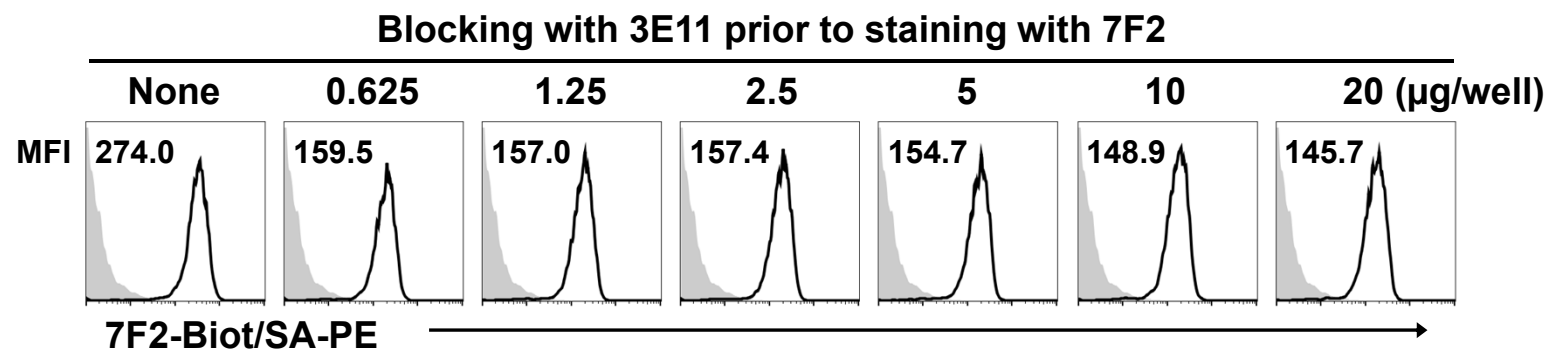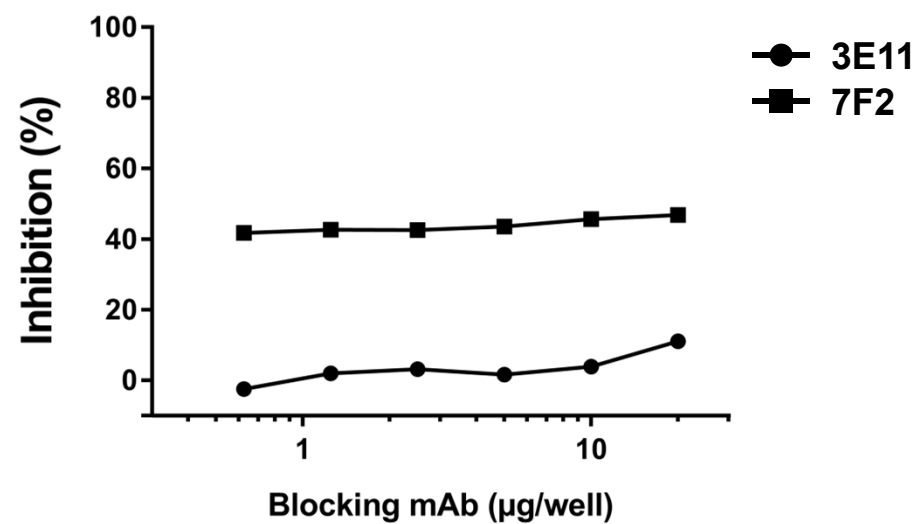

Figure S3

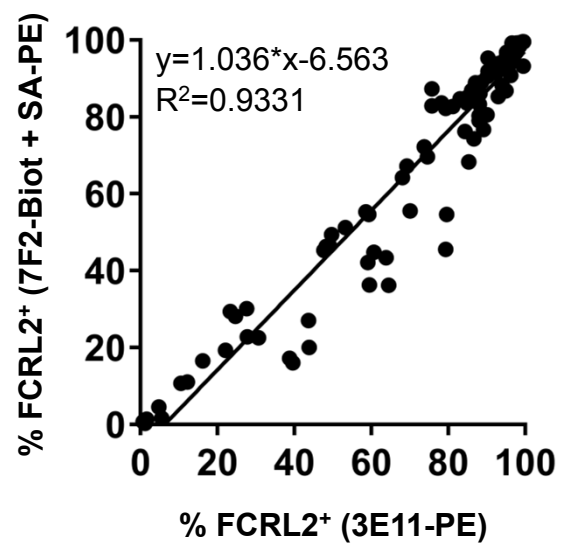

Supplement: 41408_2019_207_MOESM1_ESM.pdf [file 41408_2019_207_MOESM1_ESM.pdf]
